# Supplementary material
Source: PubMed Central journal article supplement (PMC2935316)
Supplement: NIHMS212423-supplement-Supplement1.pdf [file NIHMS212423-supplement-Supplement1.pdf]

## Supplementary Appendix

This appendix has been provided by the authors to give readers additional information about their work.

Supplement to: Swain SM, Jeong J-H, Geyer CE Jr, et al. Longer therapy, iatrogenic amenorrhea, and survival in early breast cancer. *N Engl J Med* 2010;362:2053-65.

**Supplemental Table 1. Disease-Free Outcomes Based on Hormone Receptor Status**

| Characteristic                 | Sequential-ACT Group (N = 1753)*       | Doxorubicin-Docetaxel Group (N = 1753)* | Concurrent-ACT Group (N = 1758)* |
|--------------------------------|----------------------------------------|-----------------------------------------|----------------------------------|
|                                | <i>no. of events (no. of patients)</i> |                                         |                                  |
| Estrogen receptor <sup>†</sup> |                                        |                                         |                                  |
| Positive                       | 242 (1321)                             | 291 (1324)                              | 285 (1322)                       |
| P-value                        | 0.03 vs. Concurrent ACT                | 0.82 vs. Concurrent ACT                 |                                  |
|                                | 0.02 vs. Doxorubicin-Docetaxel         |                                         |                                  |
| Negative                       | 146 (432)                              | 177 (429)                               | 172 (436)                        |
| P-value                        | 0.13 vs. Concurrent ACT                | 0.40 vs. Concurrent ACT                 |                                  |
|                                | 0.02 vs. Doxorubicin-Docetaxel         |                                         |                                  |

\*Patients with follow-up.

<sup>†</sup>Assessment of estrogen receptor (ER) and progesterone-receptor status was required before randomization. ER-positive tumors were defined by a finding of  $\geq 10$  fmol/mg cytosol protein per milligram by the dextran-coated charcoal or sucrose-density gradient method, or as positive by the enzyme immunoassay method or by immunocytochemical assay. Patients without definitive negative results (e.g., those with results deemed to be marginal or borderline) were considered to have positive results.
